# Supplementary material for: Organic cation directed hybrid lead halides of zero-dimensional to two-dimensional structures with tunable photoluminescence properties
Source: Royal Society of Chemistry journal article supplement (doi:10.1039/c9qi00684b), 2019-01-01
Supplement: c9qi00684b1.pdf [file c9qi00684b1.pdf]

# Supporting Information

## **Organic Cations Directed Hybrid Lead Halides of Zero-Dimensional to Two-Dimensional Structures with Tunable Photoluminescent Properties**

Cheng-Yang Yue,<sup>a,b</sup> Hai-Xiao Sun,<sup>a</sup> Quan-Xiu Liu,<sup>a</sup> Xin-Ming Wang,<sup>a</sup> Zhao-Shuo Yuan,<sup>a</sup> Juan Wang,<sup>a</sup> Jia-Hang Wu,<sup>a</sup> Bing Hu,<sup>b,\*</sup> Xiao-Wu Lei<sup>a,b\*</sup>

<sup>a</sup>Department of Chemistry and Chemical Engineering, Jining University, Qufu, Shandong, 273155, P. R. China

<sup>b</sup>State Key Laboratory of Structural Chemistry, Fujian Institute of Research on the Structure of Matter, Chinese Academy of Sciences, Fuzhou, Fujian, 350002, P. R. China

*\*Corresponding author:* Bing Hu, Xiao-Wu Lei

*E-mail address:* hubing@fjirsm.ac.cn; xwlei\_jnu@163.com

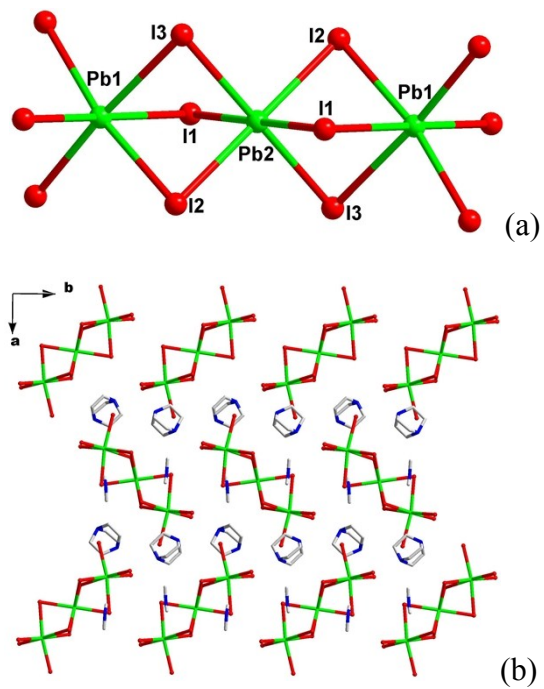

**Fig. S1.** Detailed view of the linear  $[\text{Pb}_3\text{I}_{12}]^{6-}$  oligomer (a) and packing manner in  $[001]$  plane (b) in compound **1**.

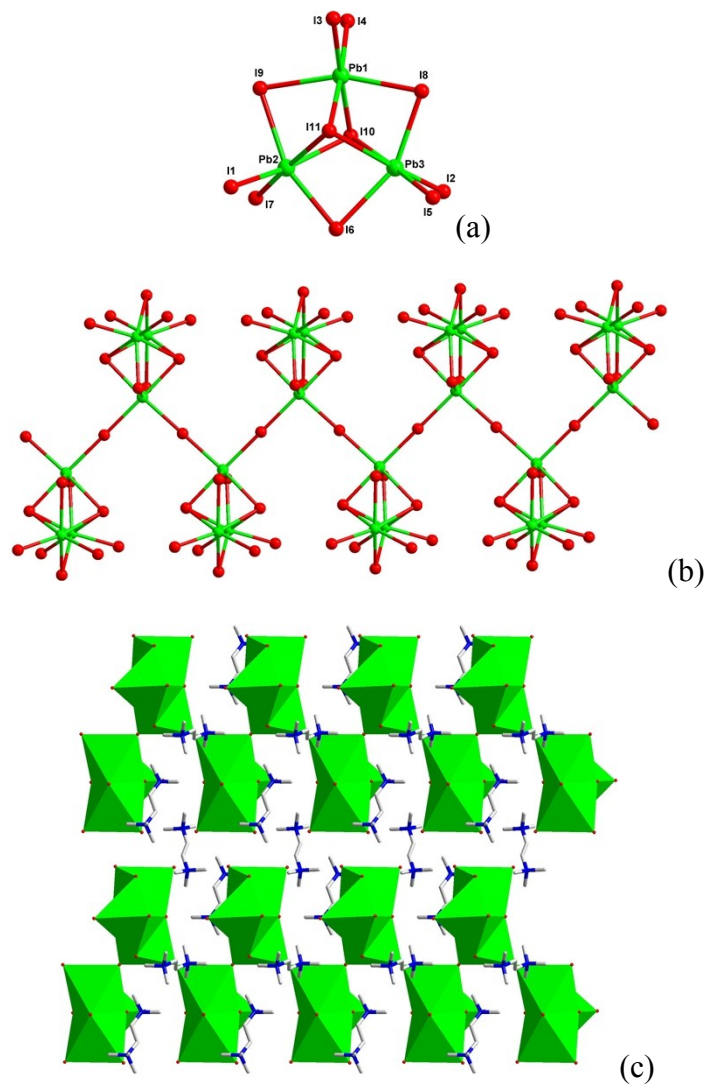

**Fig. S2.** Detailed view of the  $[\text{Pb}_3\text{I}_{11}]$  trimer (a), 1D  $[\text{Pb}_3\text{I}_{10}]^{4-}$  double chain (b) and 3D packing manner of 1D  $[\text{Pb}_3\text{I}_{10}]^{4-}$  chain (c) in compound **2**. The green polyhedrons represent the 1D  $[\text{Pb}_3\text{I}_{10}]^{4-}$  chain.

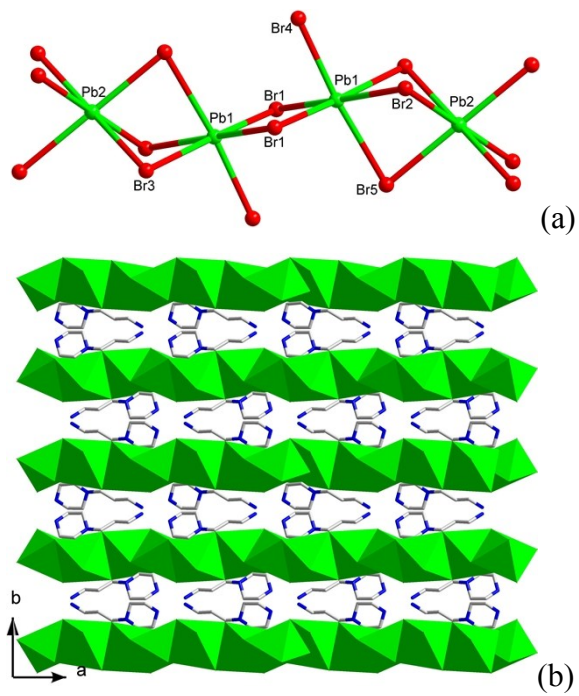

**Fig. S3.** The 1D  $[\text{Pb}_3\text{Br}_{10}]^{4-}$  chain (a) and the 3D packing structure (b) in compound **3**.

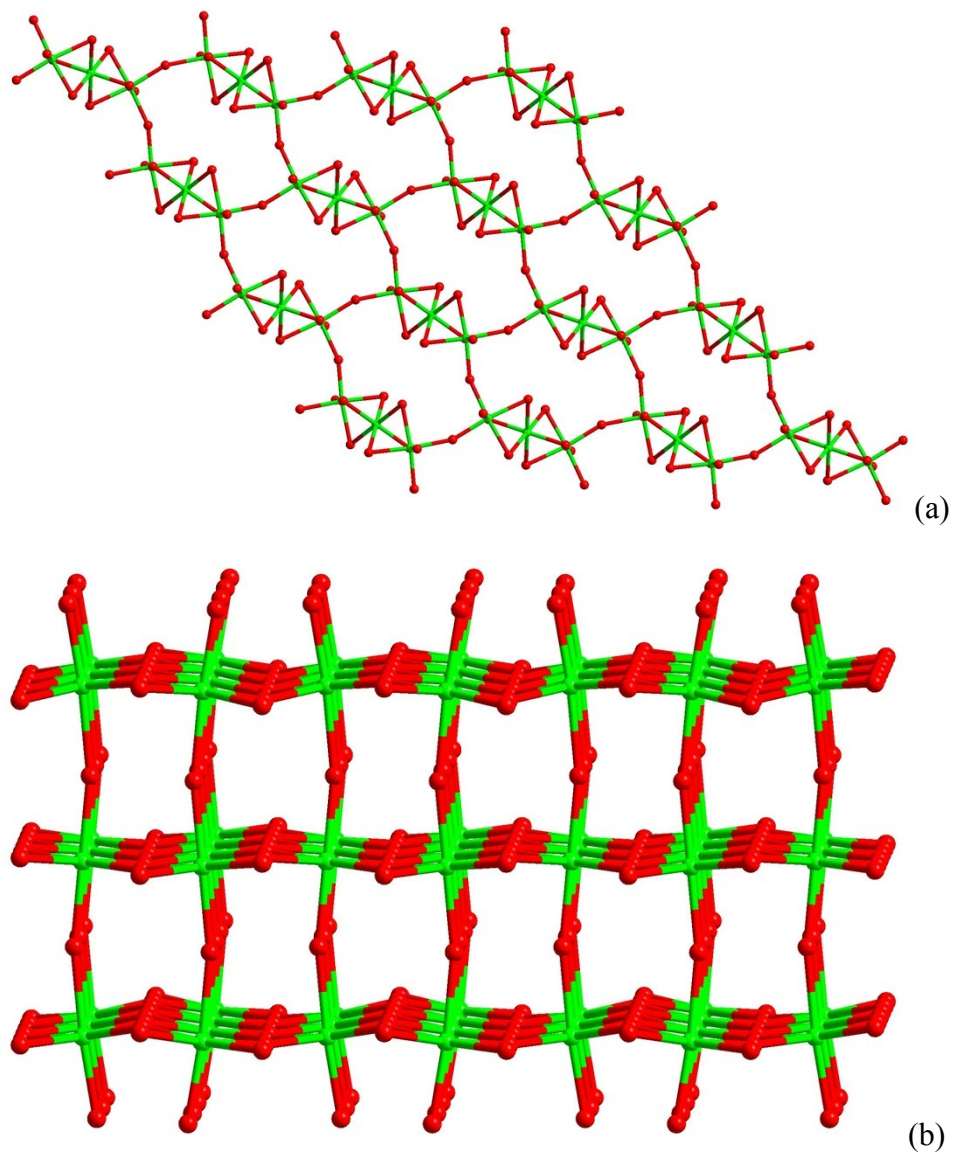

**Fig. S4.** The 2D  $[\text{Pb}_3\text{X}_{10}]^{4-}$  layers composed of linear  $[\text{Pb}_3\text{X}_{12}]$  trimers (a) and three-layered  $[\text{Pb}_3\text{X}_{10}]^{4-}$  perovskite (b).

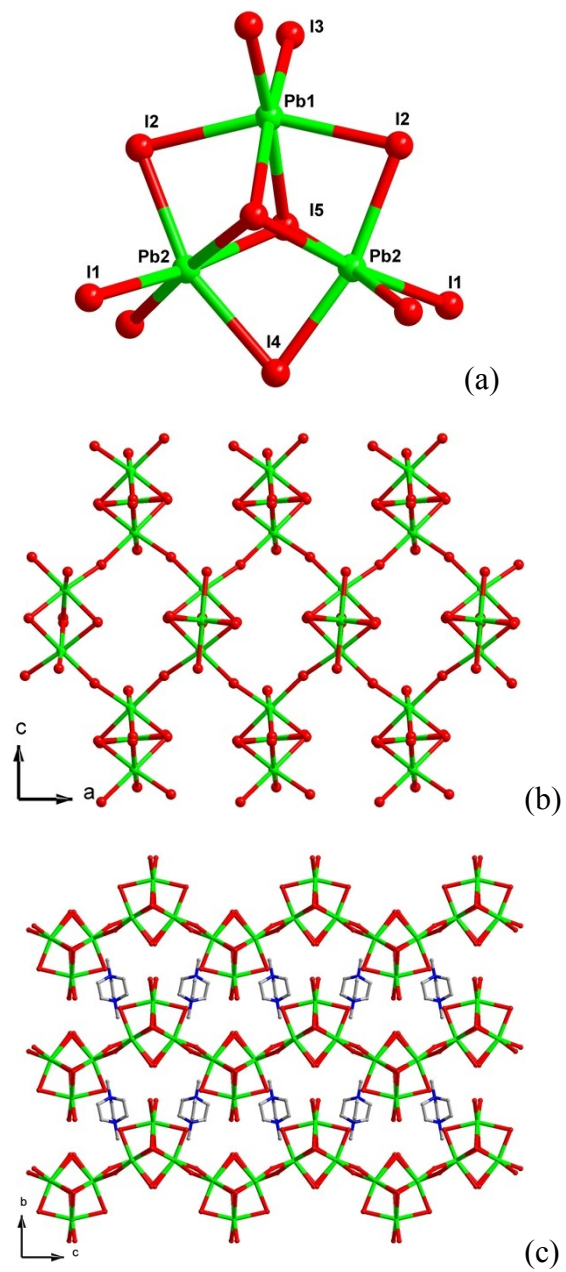

**Fig. S5.** Detailed view of  $[\text{Pb}_3\text{I}_{11}]^{5-}$  trimer (a), the 2D corrugated  $[\text{Pb}_3\text{I}_9]^{3-}$  layer (b), and the 3D packing structure of compound **4** (c).

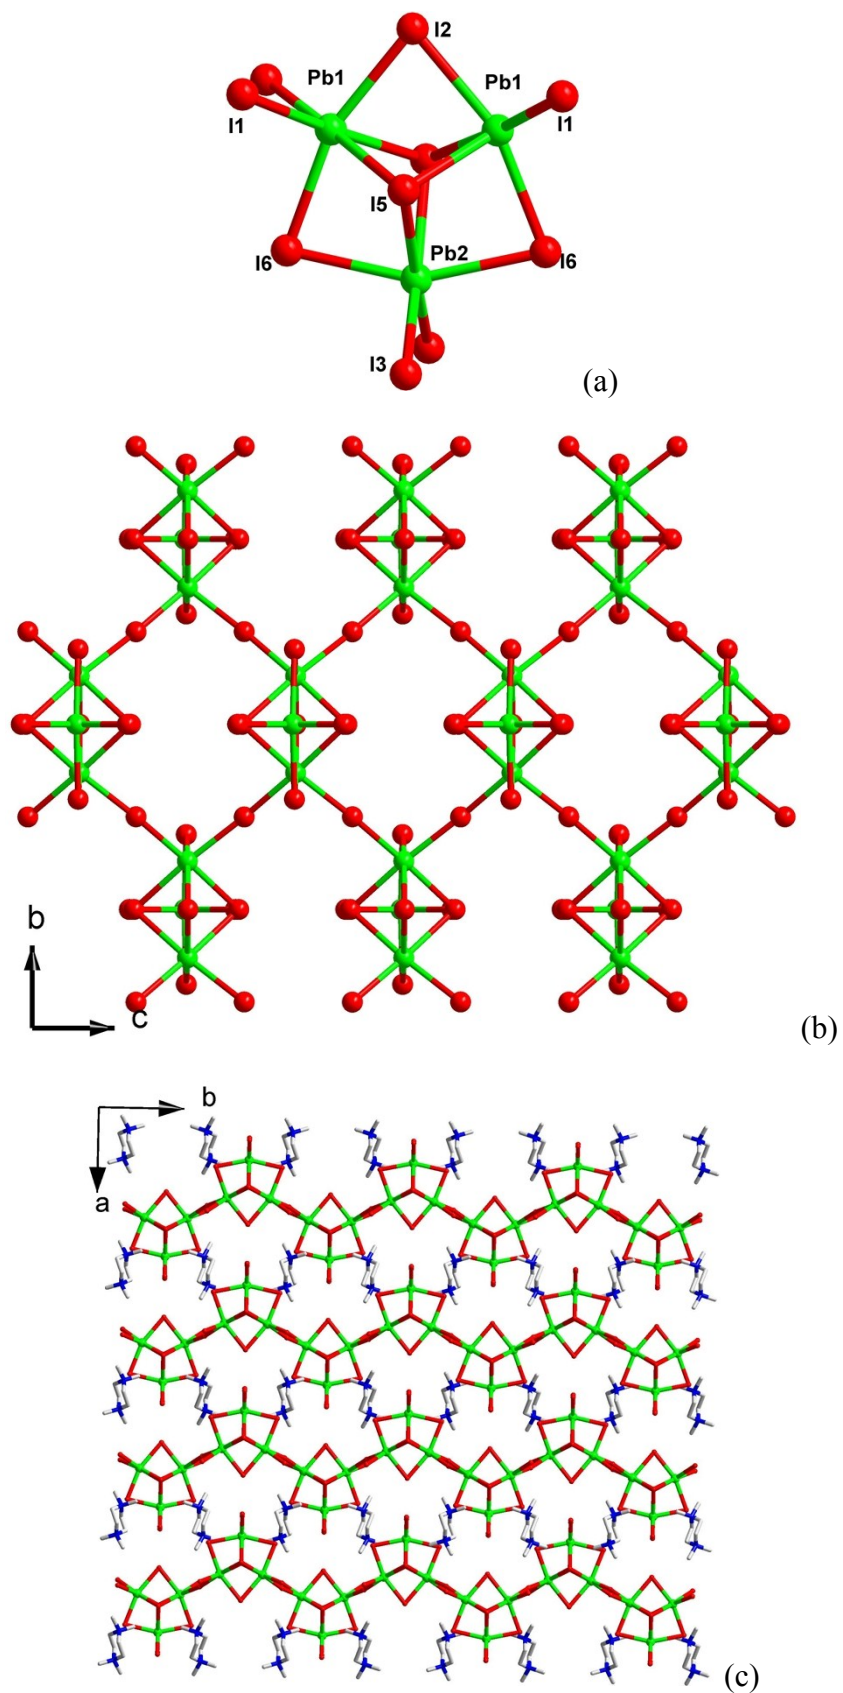

**Fig. S6.** Detailed view of  $[\text{Pb}_3\text{I}_{11}]^{5-}$  trimer (a), the 2D corrugated  $[\text{Pb}_3\text{I}_9]^{3-}$  layer (b), and the 3D packing structure of compound **5** (c).

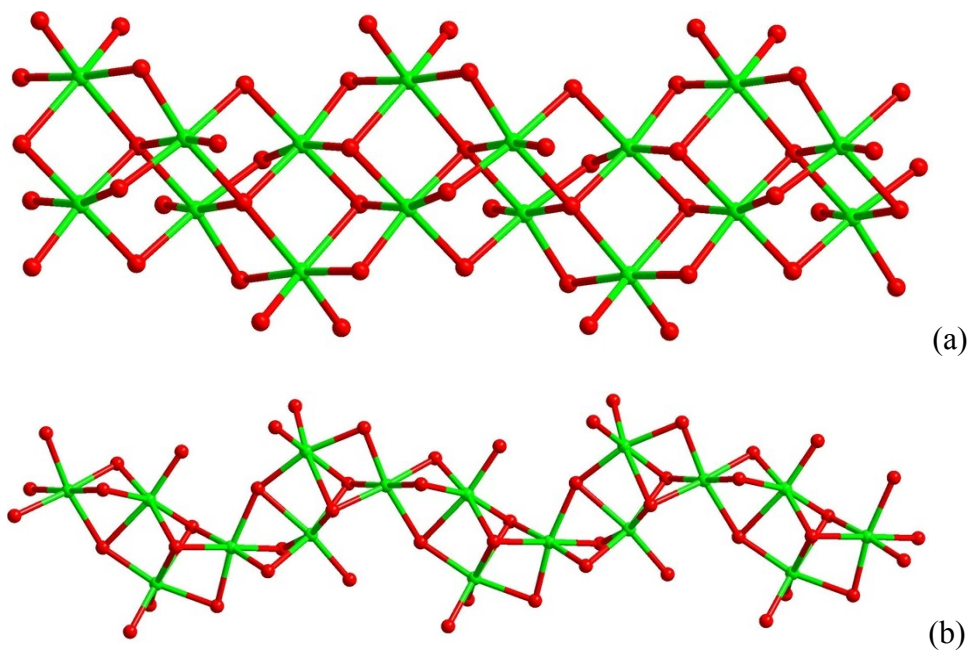

**Fig. S7.** The 1D [Pb<sub>3</sub>I<sub>9</sub>]<sup>3-</sup> chains in compound [EV]<sub>1.5</sub>[Pb<sub>3</sub>I<sub>9</sub>] (a) and (tbpm)[Pb<sub>3</sub>I<sub>9</sub>]·H<sub>2</sub>O (b).



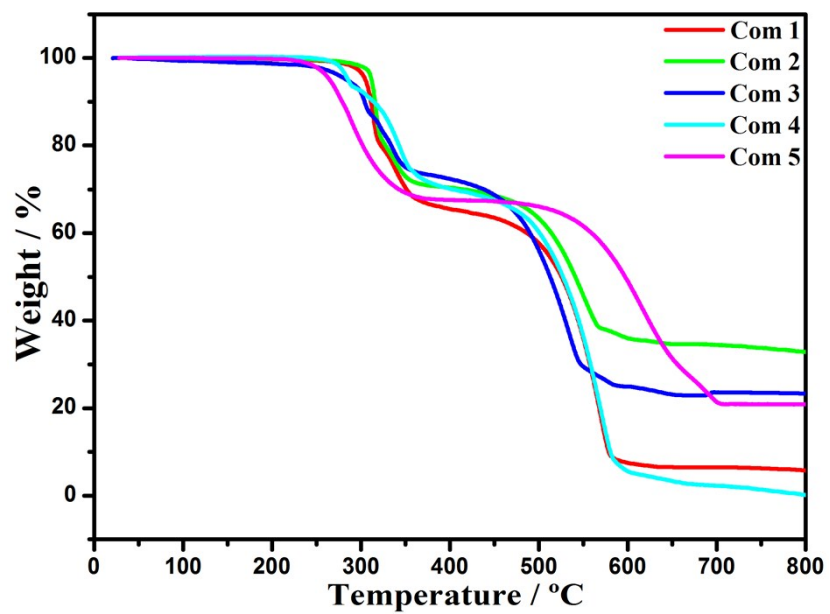

**Fig. S8.** The thermogravimetric analyses (TGA) curves for compounds 1–5.

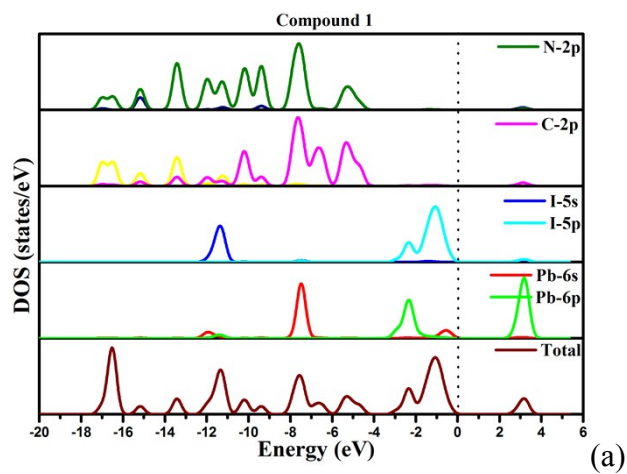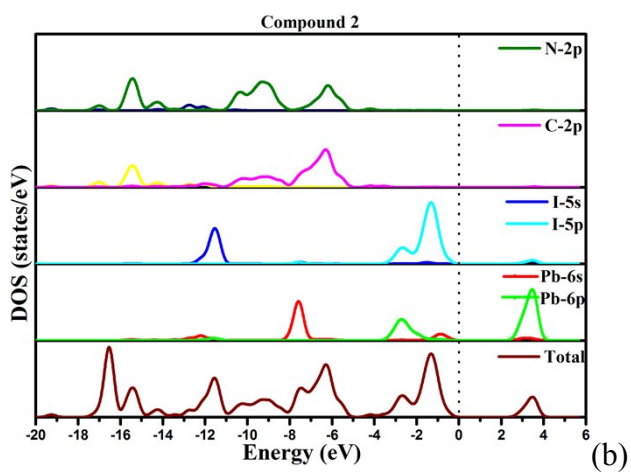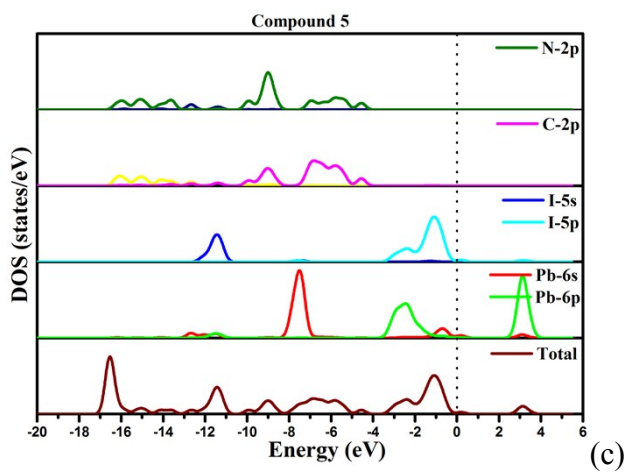

**Fig. S9.** The total and partial density of states for compounds **1** (a), **2** (b) and **5** (c).

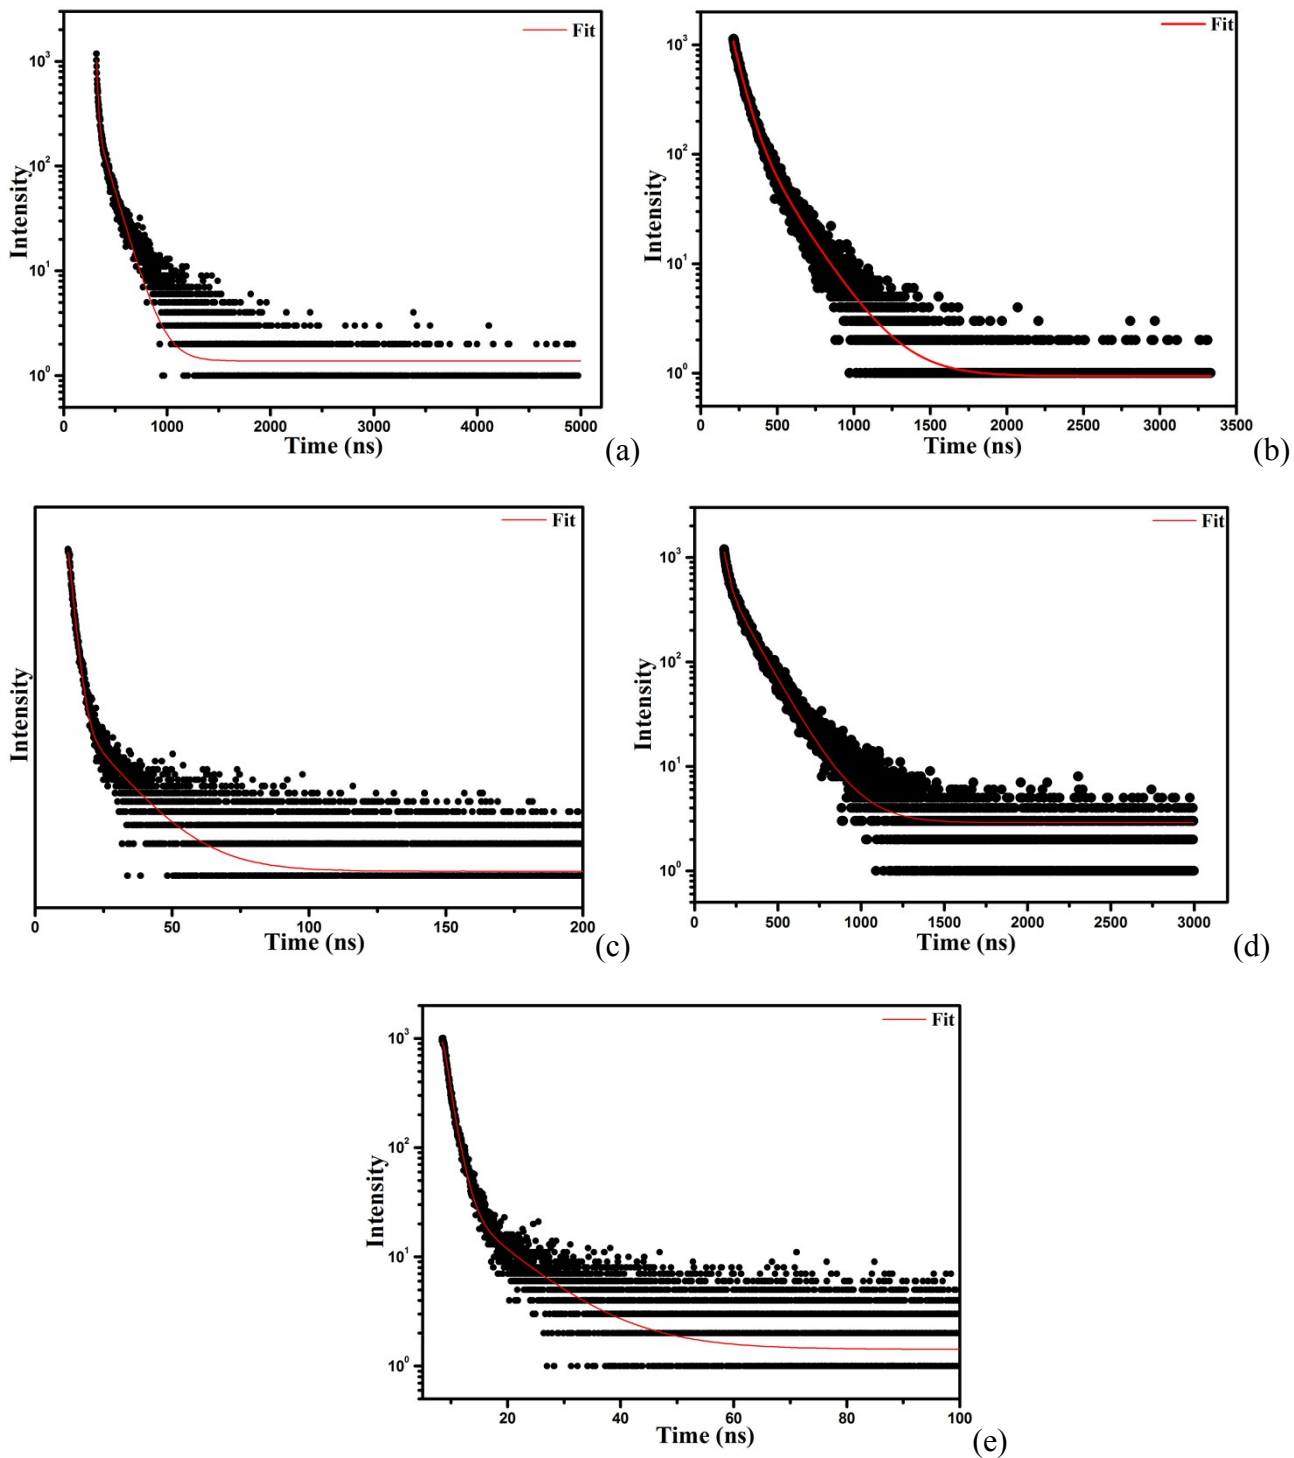

**Fig. S10.** The photoluminescence decay data and fitting curve of compounds **1** (a), **2** (b), **3** (c), **4** (d) and **5** (e) measured at room temperature.

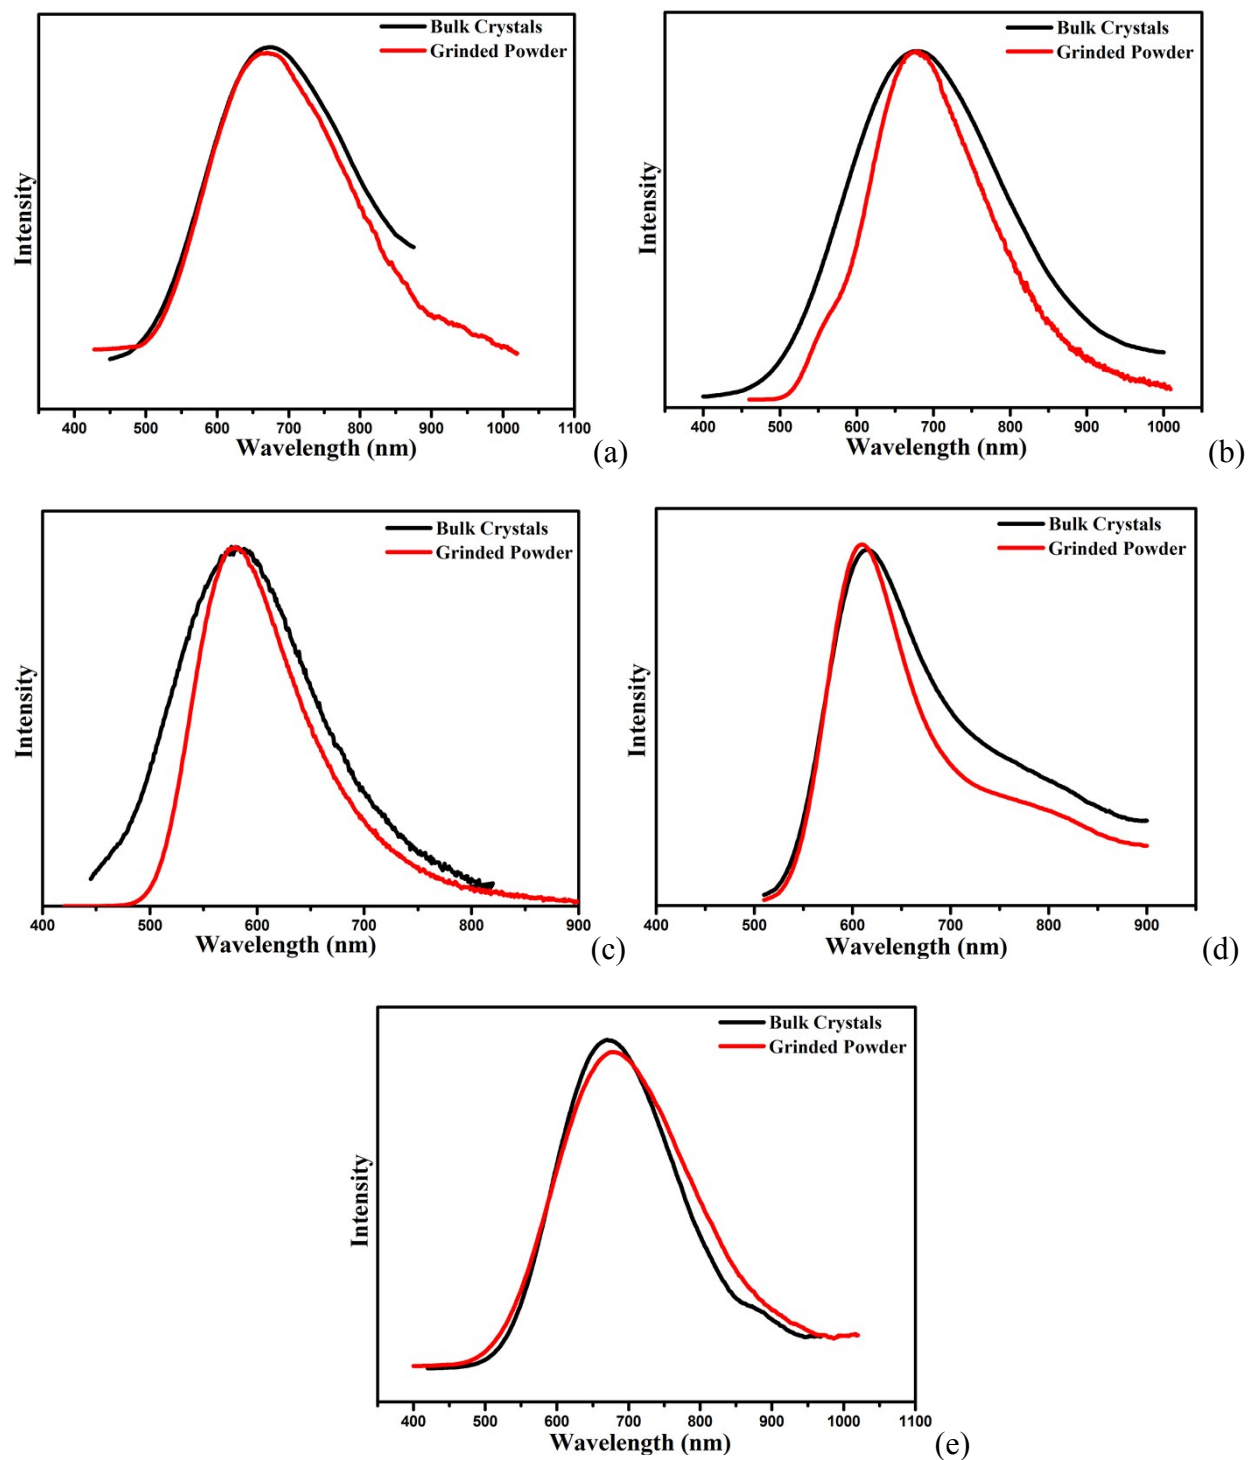

**Fig. S11.** Photoluminescence of bulk crystals and grinded powder for compounds **1** (a), **2** (b), **3** (c), **4** (d) and **5** (e) measured at room temperature.

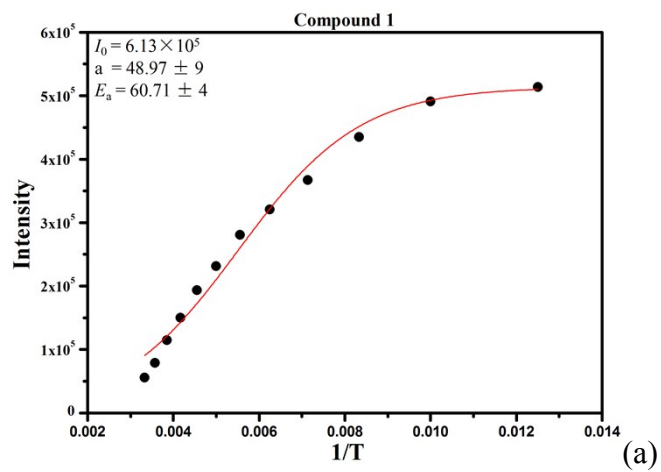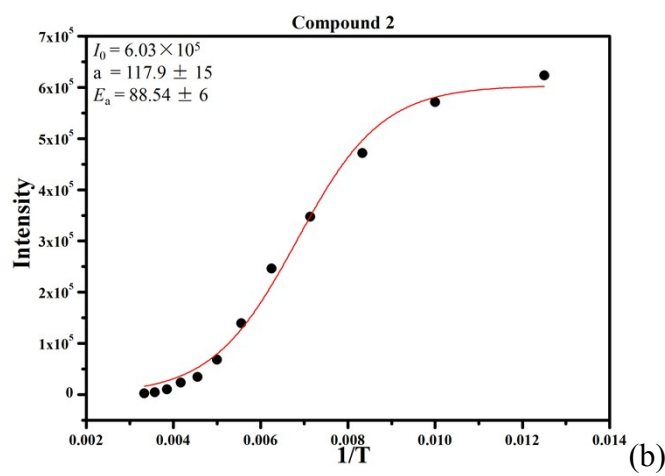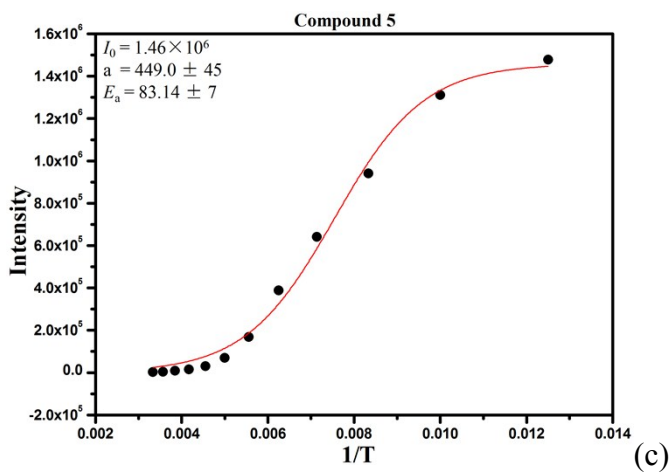

**Fig. S12.** Temperature dependence of PL intensity and the theoretical fitting data from Arrhenius-type model for compounds **1** (a), **2** (b) and **5** (c).

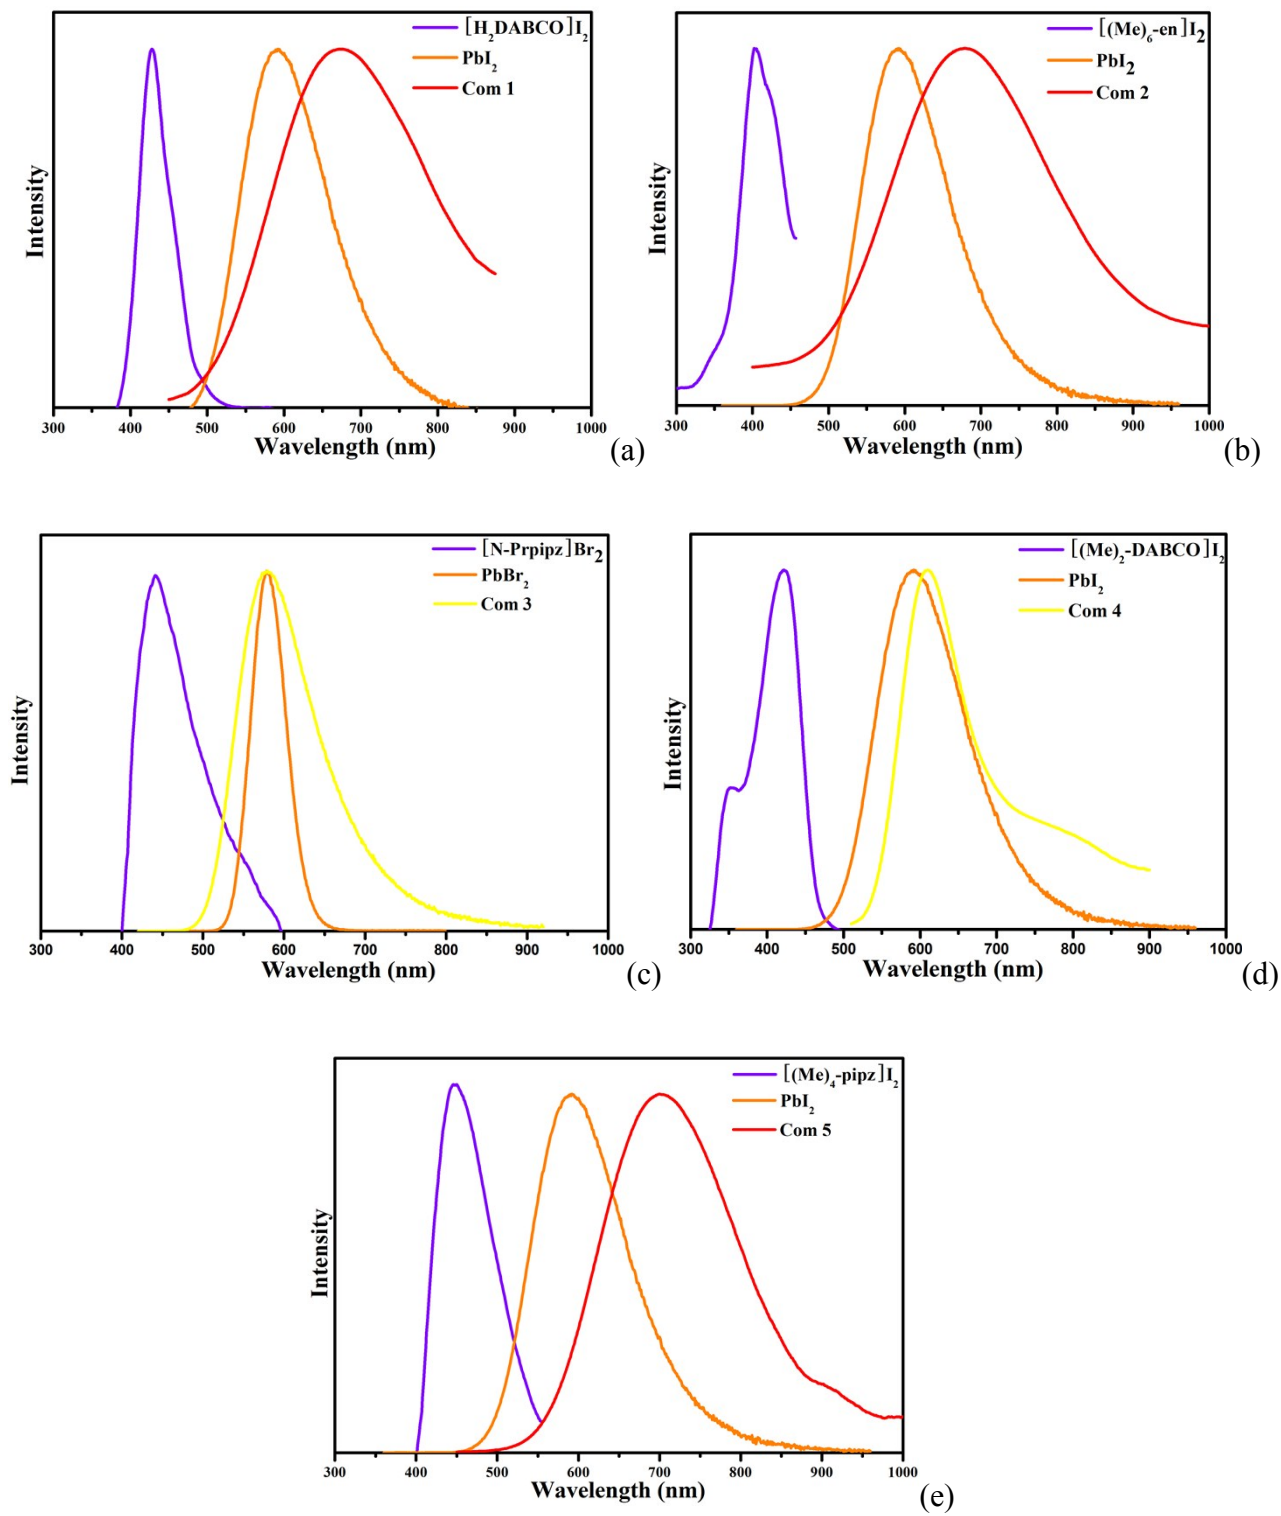

**Fig. S13.** Comparison of room-temperature PL emission spectra of compounds 1-5 with the primary materials and organic salts. Spectra are normalized for clarity.

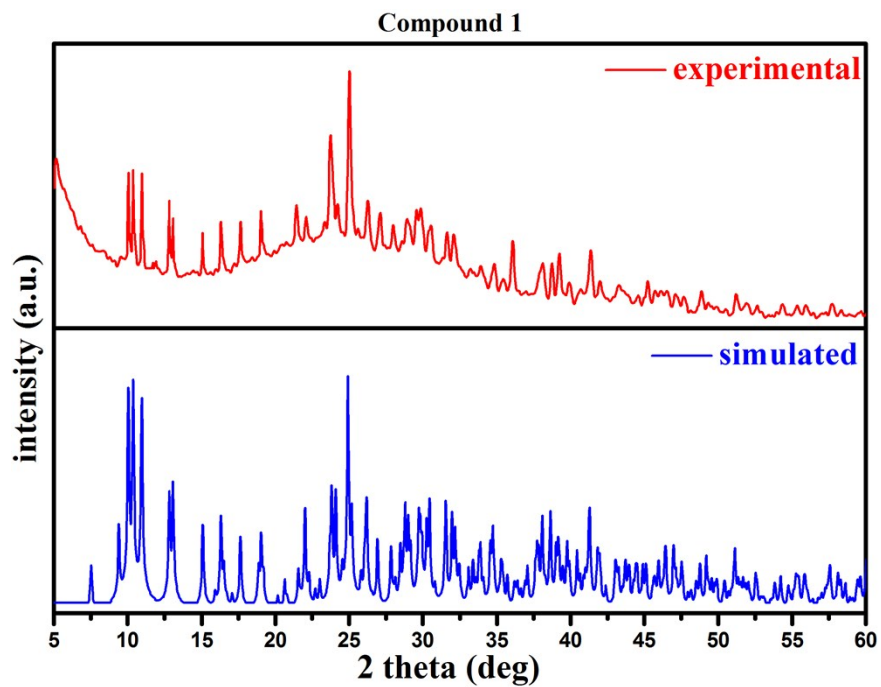

**Fig. S14.** The experimental and simulated XRD patterns of compound 1.

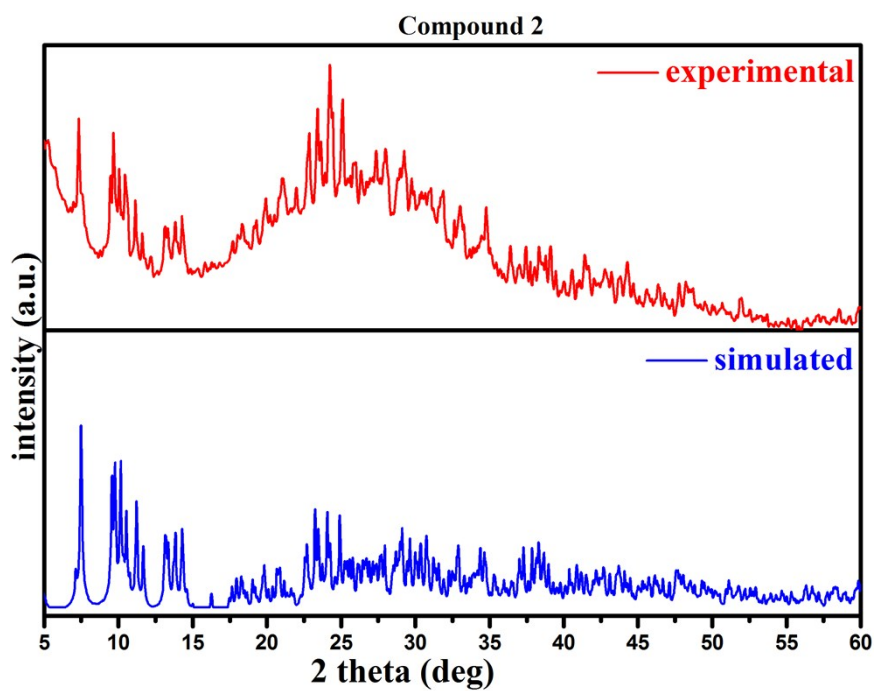

**Fig. S15.** The experimental and simulated XRD patterns of compound 2.

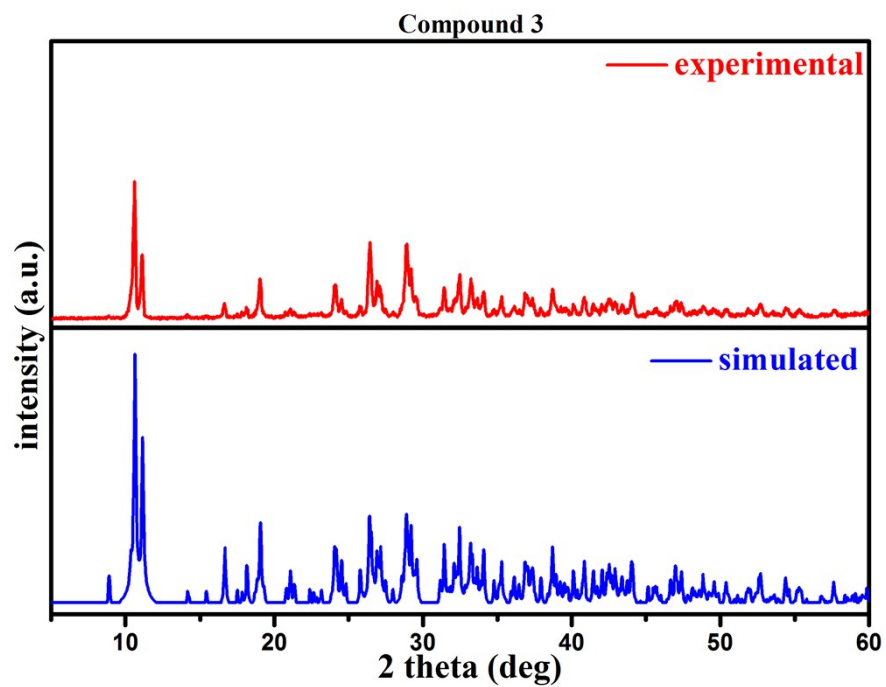

**Fig. S16.** The experimental and simulated XRD patterns of compound 3.

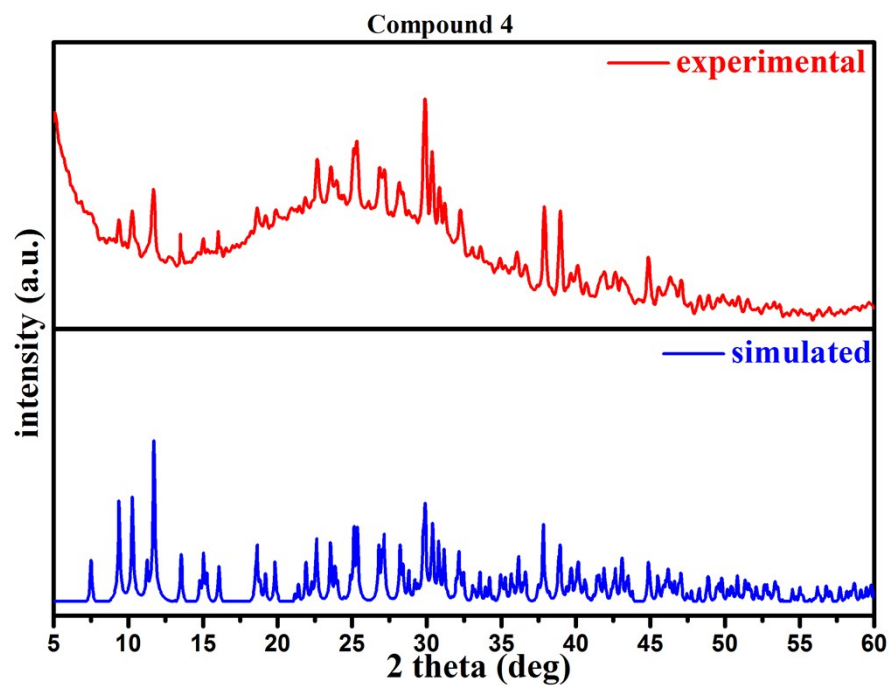

**Fig. S17.** The experimental and simulated XRD patterns of compound 4.



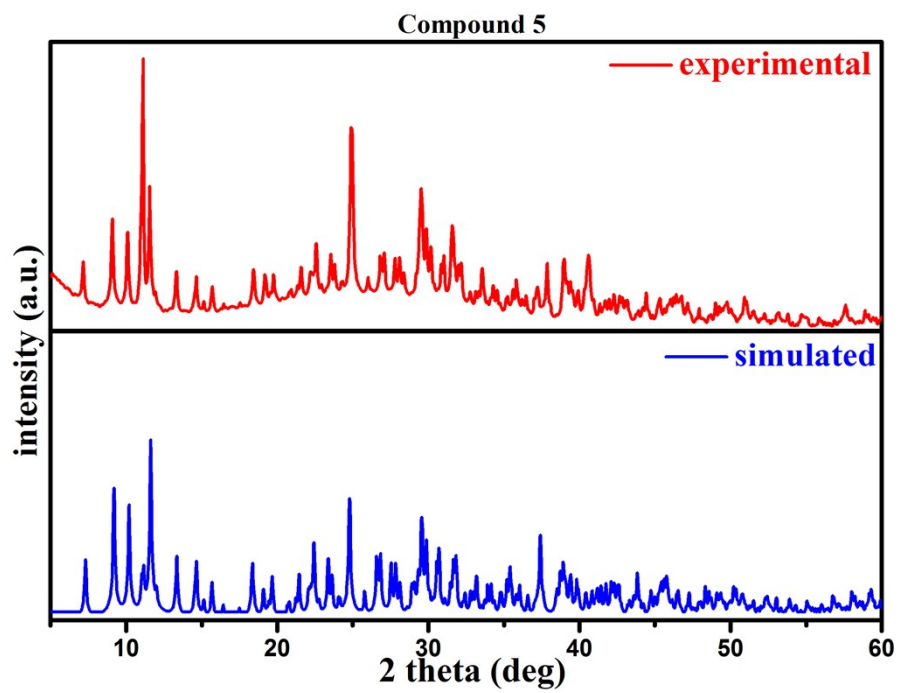

**Fig. S18.** The experimental and simulated XRD patterns of compound 5.

**Table S1.** Crystal Data and Structure Refinements for compounds **1-3**.

| Compound                                                                                 | <b>1</b>                                                                       | <b>2</b>                                                                       | <b>3</b>                                                                        |
|------------------------------------------------------------------------------------------|--------------------------------------------------------------------------------|--------------------------------------------------------------------------------|---------------------------------------------------------------------------------|
| chemical formula                                                                         | C <sub>16</sub> H <sub>44</sub> N <sub>6</sub> Pb <sub>3</sub> I <sub>12</sub> | C <sub>16</sub> N <sub>4</sub> H <sub>44</sub> Pb <sub>3</sub> I <sub>10</sub> | C <sub>14</sub> N <sub>6</sub> H <sub>38</sub> Pb <sub>3</sub> Br <sub>10</sub> |
| fw                                                                                       | 2464.94                                                                        | 2183.12                                                                        | 1711.17                                                                         |
| Space group                                                                              | <i>P2<sub>1</sub>/c</i>                                                        | <i>P</i> -1                                                                    | <i>P2<sub>1</sub>/c</i>                                                         |
| <i>a</i> /Å                                                                              | 12.450(3)                                                                      | 9.5123(8)                                                                      | 11.270(3)                                                                       |
| <i>b</i> /Å                                                                              | 11.127(3)                                                                      | 13.4417(12)                                                                    | 15.861(4)                                                                       |
| <i>c</i> /Å                                                                              | 18.665(5)                                                                      | 19.1192(17)                                                                    | 11.479(3)                                                                       |
| <i>α</i> /°                                                                              | 90                                                                             | 75.6650(10)                                                                    | 90                                                                              |
| <i>β</i> /°                                                                              | 109.395(4)                                                                     | 89.9240(10)                                                                    | 118.201(3)                                                                      |
| <i>γ</i> /°                                                                              | 90                                                                             | 72.4660(10)                                                                    | 90                                                                              |
| <i>V</i> (Å <sup>3</sup> )                                                               | 2432.4(3)                                                                      | 2251.3(3)                                                                      | 1808.2(9)                                                                       |
| <i>Z</i>                                                                                 | 2                                                                              | 2                                                                              | 2                                                                               |
| <i>D</i> <sub>calcd</sub> (g·cm <sup>-3</sup> )                                          | 3.357                                                                          | 3.220                                                                          | 3.143                                                                           |
| Temp (K)                                                                                 | 298                                                                            | 298                                                                            | 298                                                                             |
| <i>μ</i> (mm <sup>-1</sup> )                                                             | 17.942                                                                         | 18.059                                                                         | 24.997                                                                          |
| <i>F</i> (000)                                                                           | 2128                                                                           | 1888                                                                           | 1520                                                                            |
| Reflections collected                                                                    | 18695                                                                          | 26362                                                                          | 6832                                                                            |
| Unique reflections                                                                       | 5401                                                                           | 10146                                                                          | 3386                                                                            |
| Reflections ( <i>I</i> >2σ( <i>I</i> ))                                                  | 3680                                                                           | 8128                                                                           | 2322                                                                            |
| GOF on <i>F</i> <sup>2</sup>                                                             | 1.031                                                                          | 1.037                                                                          | 1.020                                                                           |
| <i>R</i> <sub>1</sub> , <i>wR</i> <sub>2</sub> ( <i>I</i> > 2σ( <i>I</i> )) <sup>a</sup> | 0.0481/ 0.1382                                                                 | 0.0366/0.0824                                                                  | 0.0578/0.1334                                                                   |
| <i>R</i> <sub>1</sub> , <i>wR</i> <sub>2</sub> (all data)                                | 0.0600/ 0.1422                                                                 | 0.0505/0.0872                                                                  | 0.0676/0.1350                                                                   |
| Δρ <sub>max</sub> (e/Å <sup>3</sup> )                                                    | 1.785                                                                          | 2.832                                                                          | 4.417                                                                           |
| Δρ <sub>min</sub> (e/Å <sup>3</sup> )                                                    | -1.483                                                                         | -1.134                                                                         | -3.935                                                                          |

**Table S2.** Crystal Data and Structure Refinements for compounds **4-5**.

| Compound                                                                                 | 4                                                                            | 5                                                                            |
|------------------------------------------------------------------------------------------|------------------------------------------------------------------------------|------------------------------------------------------------------------------|
| chemical formula                                                                         | C <sub>8</sub> N <sub>2</sub> H <sub>19</sub> Pb <sub>3</sub> I <sub>9</sub> | C <sub>8</sub> N <sub>2</sub> H <sub>21</sub> Pb <sub>3</sub> I <sub>9</sub> |
| fw                                                                                       | 1906.92                                                                      | 1908.94                                                                      |
| Space group                                                                              | C222 <sub>1</sub>                                                            | <i>Pnma</i>                                                                  |
| <i>a</i> /Å                                                                              | 9.2418(14)                                                                   | 24.171(6)                                                                    |
| <i>b</i> /Å                                                                              | 23.535(4)                                                                    | 15.841(4)                                                                    |
| <i>c</i> /Å                                                                              | 15.709(2)                                                                    | 9.290(2)                                                                     |
| <i>V</i> (Å <sup>3</sup> )                                                               | 3417.0(9)                                                                    | 3557.1(15)                                                                   |
| <i>Z</i>                                                                                 | 4                                                                            | 4                                                                            |
| <i>D</i> <sub>calcd</sub> (g·cm <sup>-3</sup> )                                          | 3.707                                                                        | 3.565                                                                        |
| Temp (K)                                                                                 | 298                                                                          | 298                                                                          |
| <i>μ</i> (mm <sup>-1</sup> )                                                             | 22.876                                                                       | 21.975                                                                       |
| <i>F</i> (000)                                                                           | 3216                                                                         | 3224                                                                         |
| Reflections collected                                                                    | 19563                                                                        | 17566                                                                        |
| Unique reflections                                                                       | 3899                                                                         | 3229                                                                         |
| Reflections ( <i>I</i> >2σ( <i>I</i> ))                                                  | 3471                                                                         | 2491                                                                         |
| GOF on <i>F</i> <sup>2</sup>                                                             | 0.974                                                                        | 1.003                                                                        |
| <i>R</i> <sub>1</sub> , <i>wR</i> <sub>2</sub> ( <i>I</i> > 2σ( <i>I</i> )) <sup>a</sup> | 0.0340/0.0794                                                                | 0.0379/0.0839                                                                |
| <i>R</i> <sub>1</sub> , <i>wR</i> <sub>2</sub> (all data)                                | 0.0391/0.0816                                                                | 0.0433/0.0858                                                                |
| Δρ <sub>max</sub> (e/Å <sup>3</sup> )                                                    | 1.785                                                                        | 2.776                                                                        |
| Δρ <sub>min</sub> (e/Å <sup>3</sup> )                                                    | -4.362                                                                       | -1.616                                                                       |

**Table S3.** Selected bond lengths (Å) for compound 1.

|              |            |              |            |
|--------------|------------|--------------|------------|
| Pb(1)-I(4)   | 3.2211(12) | Pb(2)-I(6)   | 3.0786(11) |
| Pb(1)-I(4)#1 | 3.2211(12) | Pb(2)-I(1)   | 3.1478(11) |
| Pb(1)-I(5)   | 3.2391(12) | Pb(2)-I(2)   | 3.1746(13) |
| Pb(1)-I(5)#1 | 3.2391(12) | Pb(2)-I(4)   | 3.3197(14) |
| Pb(1)-I(3)#1 | 3.2552(11) | Pb(2)-I(5)#1 | 3.3569(12) |
| Pb(1)-I(3)   | 3.2552(11) | Pb(2)-I(3)   | 3.4185(11) |

Symmetry transformations used to generate equivalent atoms: #1 -x, -y+1, -z.

**Table S4.** Selected bond lengths (Å) for compound 2.

|             |           |             |           |
|-------------|-----------|-------------|-----------|
| Pb(1)-I(11) | 3.1673(6) | Pb(2)-I(1)  | 3.0867(8) |
| Pb(1)-I(10) | 3.1952(7) | Pb(2)-I(7)  | 3.1173(7) |
| Pb(1)-I(4)  | 3.2548(4) | Pb(2)-I(6)  | 3.1834(8) |
| Pb(1)-I(3)  | 3.2550(4) | Pb(2)-I(11) | 3.3106(7) |
| Pb(1)-I(9)  | 3.2811(8) | Pb(2)-I(9)  | 3.3594(8) |
| Pb(1)-I(8)  | 3.3069(8) | Pb(2)-I(10) | 3.3906(7) |
| Pb(3)-I(5)  | 3.0818(7) | Pb(3)-I(10) | 3.3360(7) |
| Pb(3)-I(2)  | 3.1048(8) | Pb(3)-I(6)  | 3.3444(8) |
| Pb(3)-I(8)  | 3.2250(8) |             |           |

**Table S5.** Selected bond lengths (Å) for compound 3.

|               |            |               |            |
|---------------|------------|---------------|------------|
| Pb(1)-Br(4)   | 2.8631(19) | Pb(2)-Br(5)   | 3.0151(18) |
| Pb(1)-Br(1)#1 | 3.0278(16) | Pb(2)-Br(5)#2 | 3.0151(18) |
| Pb(1)-Br(2)   | 3.0286(17) | Pb(2)-Br(2)   | 3.0425(17) |
| Pb(1)-Br(3)   | 3.0637(16) | Pb(2)-Br(2)#2 | 3.0426(17) |
| Pb(1)-Br(1)   | 3.0949(17) | Pb(2)-Br(3)   | 3.0495(16) |
| Pb(1)-Br(5)   | 3.1607(19) | Pb(2)-Br(3)#2 | 3.0495(16) |

Symmetry transformations used to generate equivalent atoms: #1 -x+1, -y, -z+1, #2 -x, -y, -z.

**Table S6.** Selected bond lengths (Å) for compound 4.

|              |            |              |            |
|--------------|------------|--------------|------------|
| Pb(1)-I(3)   | 3.0300(8)  | Pb(2)-I(1)#2 | 3.1609(10) |
| Pb(1)-I(3)#1 | 3.0300(8)  | Pb(2)-I(4)   | 3.164(10)  |
| Pb(1)-I(2)   | 3.2959(9)  | Pb(2)-I(1)   | 3.1730(10) |
| Pb(1)-I(2)#1 | 3.2959(10) | Pb(2)-I(2)   | 3.1868(10) |
| Pb(1)-I(5)#1 | 3.4246(8)  | Pb(2)-I(5)   | 3.2758(9)  |
| Pb(1)-I(5)   | 3.4246(8)  | Pb(2)-I(5)#1 | 3.2811(8)  |

Symmetry transformations used to generate equivalent atoms: #1 -x+2, y, -z+3/2, #2 x+1/2, -y+7/2, -z+2.

**Table S7.** Selected bond lengths (Å) for compound **5**.

|              |            |              |            |
|--------------|------------|--------------|------------|
| Pb(1)-I(1)   | 3.1759(10) | Pb(2)-I(4)   | 3.0457(13) |
| Pb(1)-I(1)#1 | 3.1785(9)  | Pb(2)-I(3)   | 3.0509(13) |
| Pb(1)-I(6)   | 3.2195(11) | Pb(2)-I(6)   | 3.2768(10) |
| Pb(1)-I(7)   | 3.2355(9)  | Pb(2)-I(6)#2 | 3.2768(10) |
| Pb(1)-I(2)   | 3.2585(12) | Pb(2)-I(5)   | 3.4105(13) |
| Pb(1)-I(5)   | 3.2705(9)  | Pb(2)-I(4)   | 3.0457(13) |

Symmetry transformations used to generate equivalent atoms: #1  $-x+1/2, -y, z+1/2$ , #2  $x, -y+1/2, z$ .
